# Supplementary material for: Genomic Landscape of Multidrug Resistance and Virulence in Enterococcus faecalis IRMC827A from a Long-Term Patient
Source: MDPI journal article supplement (doi:10.3390/biology12101296), 2023-09-29
Supplement: s1 [file s1]

## **Genomic Landscape of Multidrug Resistance and Virulence in *Enterococcus faecalis* IRMC827A from a Long-Term Patient**

J. Francis Borgio <sup>1</sup>, Reem AlJindan <sup>2\*</sup>, Lujeeen H Alghourab <sup>3</sup>, Rahaf Alquwaie <sup>4</sup>, Razan Aldahhan <sup>1</sup>, Norah F Alhur<sup>1</sup>, Doaa M. AlEraky <sup>5</sup>, Nehal Mahmoud <sup>2</sup>, Noor B. Almandil <sup>6</sup>, Sayed AbdulAzeez <sup>1\*</sup>

<sup>1</sup> Department of Genetic Research, Institute for Research and Medical Consultations (IRMC), Imam Abdulrahman Bin Faisal University, Dammam 31441, Saudi Arabia. Email: [fbalexander@iau.edu.sa](mailto:fbalexander@iau.edu.sa) (JFB); [raldahhan@iau.edu.sa](mailto:raldahhan@iau.edu.sa) (RazanA); [norah.f.s.2@gmail.com](mailto:norah.f.s.2@gmail.com) (NFA); [asayed@iau.edu.sa](mailto:asayed@iau.edu.sa) (SA)

<sup>2</sup> Department of Microbiology, College of Medicine, Imam Abdulrahman Bin Faisal University, Dammam 31441, Saudi Arabia. Email: [raljindan@iau.edu.sa](mailto:raljindan@iau.edu.sa) (RJ); [nmhossin@iau.edu.sa](mailto:nmhossin@iau.edu.sa) (NM)

<sup>3</sup> Summer Research Program, Institute for Research and Medical Consultations (IRMC), Imam Abdulrahman Bin Faisal University, Dammam 31441, Saudi Arabia. Email: [2170004781@iau.edu.a](mailto:2170004781@iau.edu.a) (LHA)

<sup>4</sup> Master Program of Biotechnology, Institute for Research and Medical Consultations (IRMC), Imam Abdulrahman Bin Faisal University, Dammam 31441, Saudi Arabia. Email: [2230500195@iau.edu.sa](mailto:2230500195@iau.edu.sa) (RahafA)

<sup>5</sup> Department of Biomedical Dental Science, Microbiology and Immunology Division, Collage of Dentistry, Dammam 31441, Saudi Arabia

<sup>6</sup> Department of Clinical Pharmacy Research, Institute for Research and Medical Consultations (IRMC), Imam Abdulrahman Bin Faisal University, Dammam 31441, Saudi Arabia. Email: [nbalmandil@iau.edu.sa](mailto:nbalmandil@iau.edu.sa) (NBA)

**Table S1.** List of virulence factors in the genome of *E. faecalis* IRMC827A.

| S. No | Source                         | Source ID                          | SO      | Gene          | Product                                                     | Classification                                       | SC  | QC  | % Identity | E-Value |
|-------|--------------------------------|------------------------------------|---------|---------------|-------------------------------------------------------------|------------------------------------------------------|-----|-----|------------|---------|
| 1     | ResFinder 4.1                  | CP003726.1                         | a       | <i>ElrA</i>   |                                                             |                                                      |     |     | 98.76      |         |
| 2     | ResFinder 4.1 / Victors        | CP002491.1 / 29377514              | b / c   | <i>SrtA</i>   | Sortase A, LPXTG specific                                   |                                                      | 100 | 100 | 100        | 1e-134  |
| 3     | ResFinder 4.1 / VFDB           | AF260876.1 / VFG002166             | d / c   | <i>ace</i>    | Collagen adhesin                                            | Adherence, MSCRAMM                                   | 78  | 84  | 96         | 1e-296  |
| 4     | ResFinder 4.1                  | CP002491.1                         | b       | <i>cCF10</i>  |                                                             |                                                      |     |     | 99.76      |         |
| 5     | ResFinder 4.1                  | 295112306                          | e       | <i>cOBI</i>   |                                                             |                                                      |     |     | 99.53      |         |
| 6     | ResFinder 4.1                  | CP002621.1                         | f       | <i>cad</i>    |                                                             |                                                      |     |     | 99.89      |         |
| 7     | ResFinder 4.1                  | AF435439.1                         | g       | <i>camE</i>   | Sex pheromone cam373 precursor                              |                                                      |     |     | 99.80      |         |
| 8     | ResFinder 4.1 / VFDB / Victors | CP003726.1 / VFG042976 / 306753329 | a / c / | <i>ebpA</i>   | Von Willebrand factor type A domain protein                 | Adherence, Biofilm formation, Sortase-assembled pili | 100 | 74  | 99         | 1e-130  |
| 9     | ResFinder 4.1 / VFDB           | CP003726.1 / VFG042977             | a / C   | <i>ebpB</i>   | Cell wall surface anchor family protein                     | Adherence, Biofilm formation, Sortase-assembled pili | 100 | 100 | 98         | 1e-274  |
| 10    | ResFinder 4.1                  | AE016830.1                         | c       | <i>efaAfs</i> |                                                             |                                                      |     |     | 99.68      |         |
| 11    | ResFinder 4.1                  | CP002491.1                         | b       | <i>hylA</i>   |                                                             |                                                      |     |     | 98.93      |         |
| 12    | ResFinder 4.1                  | AE016830.1                         | c       | <i>tpx</i>    |                                                             |                                                      |     |     | 99.61      |         |
| 13    | Victors                        | 15676067                           | h       | <i>tufA</i>   | Translation elongation factor Tu                            |                                                      | 98  | 98  | 81         | 1e-189  |
| 14    | Victors                        | 29376182                           | c       | <i>EF1623</i> | Ethanolamine utilization protein similar to pdua/pduj       |                                                      | 100 | 100 | 100        | 7e-46   |
| 15    | Victors                        | 29376163                           | c       | <i>scrB-1</i> | Sucrose-6-phosphate hydrolase (EC                           |                                                      | 100 | 99  | 98         | 1e-293  |
| 16    | Victors / VFDB                 | 29375537                           | c       | <i>bopD</i>   | Maltose operon transcriptional repressor malr, lacI family  | Biofilm formation                                    | 100 | 100 | 99         | 1e-190  |
| 17    | VFDB                           | VFG043509                          | c       | <i>fs2</i>    | Cell wall surface anchor family protein                     |                                                      | 25  | 100 | 95         | 1e-231  |
| 18    | Victors                        | 29375014                           | c       | <i>EF0376</i> | Putative lipoprotein                                        |                                                      | 100 | 100 | 100        | 1e-206  |
| 19    | VFDB / Victors                 | VFG001359 / 15903537               | i / j   | <i>psaA</i>   | Manganese ABC transporter, periplasmic-binding protein sita | Manganese uptake, ABC transporter                    | 89  | 87  | 82         | 1e-135  |
| 20    | Patric / Victors               | LMOh7858_1 898 / 116516623         | k / l   | <i>purB</i>   | Adenylosuccinate lyase, SAICAR lyase                        |                                                      | 94  | 94  | 82         | 1e-200  |
| 21    | VFDB                           | VFG002189                          | c       | <i>cpsB</i>   | Phosphatidate cytidyltransferase                            | Antiphagocytosis                                     | 100 | 100 | 99         | 1e-147  |
| 22    | Victors                        | 29377157                           | c       | <i>EF2675</i> | Competence protein coia                                     |                                                      | 99  | 100 | 95         | 1e-226  |
| 23    | Victors                        | 29376329                           | c       | <i>purL</i>   | Phosphoribosylformylglycinamide synthase,                   |                                                      | 100 | 100 | 99         | 0.0     |

|    |                |                      |   |                    |                                                                                                                                                           |                                                      |     |     |     |        |
|----|----------------|----------------------|---|--------------------|-----------------------------------------------------------------------------------------------------------------------------------------------------------|------------------------------------------------------|-----|-----|-----|--------|
|    |                |                      |   |                    | synthetase subunit                                                                                                                                        |                                                      |     |     |     |        |
| 24 | VFDB           | VFG002196            | c | <i>EF3023</i>      | Hyaluronate lyase precursor, polysaccharide lyase, family 8                                                                                               | Exoenzyme, Spreading factor                          | 84  | 78  | 98  | 0.0    |
| 25 | VFDB           | VFG043508            | c | <i>fssI</i>        | Hypothetical protein                                                                                                                                      |                                                      | 99  | 97  | 98  | 0.0    |
| 26 | Victors        | 67043736             | m | <i>perR</i>        | Peroxide stress regulator perr, FUR family                                                                                                                |                                                      | 100 | 100 | 100 | 1e-82  |
| 27 | Victors        | 29376108             | c | <i>recQ-1</i>      | ATP-dependent DNA helicase recq                                                                                                                           |                                                      | 99  | 99  | 99  | 1e-275 |
| 28 | Victors        | 29376080             | c | <i>EF1513</i>      | ABC transporter, substrate-binding protein (cluster 5, nickel/peptides/opines)                                                                            |                                                      | 100 | 100 | 99  | 0.0    |
| 29 | Victors        | 29375449             | c | <i>EF0861</i>      | Acetyltransferase, GNAT family                                                                                                                            |                                                      | 100 | 100 | 99  | 1e-88  |
| 30 | Victors / VFDB | 16804506 / VFG000077 | n | <i>clpP</i>        | ATP-dependent Clp protease proteolytic subunit clpp                                                                                                       |                                                      | 94  | 94  | 83  | 8e-87  |
| 31 | Victors        | 29376708             | c | <i>map</i>         | Methionine aminopeptidase                                                                                                                                 |                                                      | 100 | 100 | 100 | 1e-151 |
| 32 | Victors        | 29374885             | c | <i>brnQ</i>        | Na (+)-dependent branched-chain amino acid transporter                                                                                                    |                                                      | 100 | 100 | 100 | 1e-256 |
| 33 | Victors        | 29376132             | c | <i>psr</i>         | Cell envelope-associated transcriptional attenuator lytr-cpsa-Psr, subfamily A1                                                                           |                                                      | 100 | 100 | 99  | 1e-225 |
| 34 | VFDB           | VFG002190            | c | <i>cpsA</i>        | Undecaprenyl diphosphate synthase                                                                                                                         | Antiphagocytosis                                     | 100 | 100 | 99  | 1e-156 |
| 35 | Victors        | 29375019             | c | <i>EF0382</i>      | Regulator of polyketide synthase expression                                                                                                               |                                                      | 100 | 100 | 100 | 1e-304 |
| 36 | Victors        | 29376338             | c | <i>EF1792</i>      | Hypothetical protein                                                                                                                                      |                                                      | 100 | 75  | 98  | 1e-39  |
| 37 | Victors        | 29377421             | c | <i>EF2957</i>      | Maltose O-acetyltransferase                                                                                                                               |                                                      | 100 | 100 | 100 | 1e-106 |
| 38 | Victors        | 15901058             | i | <i>SP 1193</i>     | Galactose-6-phosphate isomerase, laca subunit                                                                                                             |                                                      | 99  | 99  | 83  | 1e-62  |
| 39 | VFDB / Victors | VFG002164            | c | <i>prgB/asc 10</i> | Aggregation substance Asa1/prgb                                                                                                                           | Adherence                                            | 56  | 100 | 97  | 0.0    |
| 40 | VFDB           | VFG002165            | c | <i>efaA</i>        | Manganese ABC transporter, periplasmic-binding protein sita                                                                                               | Adherence                                            | 100 | 100 | 99  | 1e-178 |
| 41 | Victors        | 29376164             | c | <i>scrR-1</i>      | Sucrose operon repressor scrr, lacI family                                                                                                                |                                                      | 100 | 99  | 100 | 1e-183 |
| 42 | Victors        | 29376159             | c | <i>phrB</i>        | Deoxyribodipyrimidine photolyase                                                                                                                          |                                                      | 100 | 100 | 98  | 1e-286 |
| 43 | Victors        | 29376105             | c | <i>EF1542</i>      | Hypothetical protein                                                                                                                                      |                                                      | 71  | 100 | 99  | 1e-195 |
| 44 | Victors        | 29375870             | c | <i>EF1302</i>      | Transcriptional regulator                                                                                                                                 |                                                      | 100 | 100 | 99  | 1e-167 |
| 45 | Victors        | 29377084             | c | <i>EF2598</i>      | PTS system, beta-glucoside-specific IIB component / PTS system, beta-glucoside-specific IIC component / PTS system, beta-glucoside-specific IIA component |                                                      | 100 | 100 | 99  | 0.0    |
| 46 | Victors        | 29377078             | c | <i>EF2591</i>      | Glyoxalase family protein                                                                                                                                 |                                                      | 100 | 97  | 100 | 1e-156 |
| 47 | VFDB           | VFG042978            | c | <i>ebpC</i>        | Cell wall surface anchor family protein                                                                                                                   | Adherence, Biofilm formation, Sortase-assembled pili | 100 | 100 | 99  | 0.0    |
| 48 | VFDB / Victors | VFG042979 / 29375670 | c | <i>srtC</i>        | Sortase A, LPXTG specific                                                                                                                                 | Adherence, Biofilm formation, Sortase-               | 99  | 98  | 99  | 1e-160 |

|    |         |          |   |               |                                               |                |     |     |     |        |
|----|---------|----------|---|---------------|-----------------------------------------------|----------------|-----|-----|-----|--------|
|    |         |          |   |               |                                               | assembled pili |     |     |     |        |
| 49 | Victors | 29375331 | c | <i>EF0737</i> | Hypothetical protein                          |                | 100 | 100 | 99  | 1e-298 |
| 50 | Victors | 76788416 | o | <i>lepA</i>   | Translation elongation factor lepa            |                | 99  | 98  | 83  | 1e-302 |
| 51 | Victors | 29376151 | c | <i>EF1590</i> | N1-spermidine/spermine acetyltransferase paia |                | 100 | 100 | 100 | 1e-100 |
| 52 | Victors | 29376139 | c | <i>thyA</i>   | Thymidylate synthase                          |                | 100 | 100 | 99  | 1e-189 |

SO: Source organism; a = *E. faecalis* D32; b = *E. faecalis* 62; c = *E. faecalis* V583; d: *E. faecalis* strain MC02152/TX0024; e: *Enterococcus* sp. 7L76; f: *E. faecalis* OG1RF; g: *E. faecalis* strain OG1X; h: *Neisseria meningitidis* MC58; i: *Streptococcus pneumoniae* TIGR4; j: *S. pneumoniae* R6; k: *Listeria monocytogenes* serotype 4b str. H7858; l: *S. pneumoniae* D39; m: *E. faecalis*; n: *Listeria monocytogenes* EGD-e; o: *Streptococcus agalactiae* A909; SC: Subject coverage; QC: Query coverage.

**Table S2: Metagenomic read mapping of *E. faecalis* IRMC827A through various database.**

| Template                           | Function                                                                                                 | Genome | GAS  | EAS | TL   | TI     | TC     | QI     | QC     | q value | p value |
|------------------------------------|----------------------------------------------------------------------------------------------------------|--------|------|-----|------|--------|--------|--------|--------|---------|---------|
| CARD BAE15963.1                    | <i>Dfrg</i>                                                                                              | a      | 501  | 3   | 498  | 100.00 | 100.00 | 100.00 | 100.00 | 489.79  | 1.0e-26 |
| CARD NZ_CP018138.1_1692408_1695312 | <i>S. pneumoniae</i> 23S rna mutation conferring resistance to macrolides and streptogramins antibiotics | b      | 1892 | 20  | 2904 | 89.29  | 100.38 | 88.95  | 99.62  | 1831.46 | 1.0e-26 |
| CARD CDO61513.1                    | <i>Efra</i>                                                                                              | c      | 1394 | 10  | 1457 | 98.63  | 99.59  | 99.04  | 100.41 | 1362.68 | 1.0e-26 |
| CARD AAO82601.1                    | <i>E. faecalis</i> liaf mutant conferring daptomycin resistance                                          | d      | 711  | 5   | 732  | 98.91  | 100.00 | 98.91  | 100.00 | 694.70  | 1.0e-26 |
| CARD AEA93051.1                    | <i>E. faecalis</i> cls conferring resistance to daptomycin                                               | e      | 1422 | 10  | 1446 | 99.38  | 100.00 | 99.38  | 100.00 | 1390.96 | 1.0e-26 |
| CARD NP_863168.1                   | <i>E. faecium</i> chloramphenicol acetyltransferase                                                      | c      | 528  | 4   | 648  | 93.67  | 100.00 | 93.67  | 100.00 | 513.47  | 1.0e-26 |
| CARD EOD99669.1                    | <i>Dfre</i>                                                                                              | f      | 459  | 3   | 495  | 97.37  | 100.00 | 97.37  | 100.00 | 447.85  | 1.0e-26 |
| CARD AAO82600.1                    | <i>E. faecalis</i> lias mutant conferring daptomycin resistance                                          | d      | 1083 | 8   | 1104 | 99.28  | 100.00 | 99.28  | 100.00 | 1058.88 | 1.0e-26 |
| CARD CAJ67339.1                    | <i>Tetm</i>                                                                                              | g      | 1617 | 13  | 1920 | 94.69  | 100.00 | 94.69  | 100.00 | 1576.26 | 1.0e-26 |
| CARD YP_006374661.1                | <i>E. faecium</i> EF-Tu mutants conferring resistance to GE2270A                                         | h      | 882  | 9   | 1272 | 85.93  | 99.29  | 86.54  | 100.71 | 854.04  | 1.0e-26 |
| CARD AAA22851.1                    | <i>Tet(L)</i>                                                                                            | i      | 1371 | 9   | 1377 | 99.78  | 100.00 | 99.78  | 100.00 | 1341.36 | 1.0e-26 |
| CARD AAT46077.1                    | <i>Lsaa</i>                                                                                              | j      | 1443 | 10  | 1497 | 98.73  | 100.00 | 98.73  | 100.00 | 1410.90 | 1.0e-26 |
| CARD WP_002389492.1                | <i>E. faecalis</i> gshf with mutation conferring daptomycin resistance                                   | k      | 2232 | 15  | 2271 | 99.38  | 100.00 | 99.38  | 100.00 | 2185.32 | 1.0e-26 |
| CARD NP_816529.1                   | <i>E. faecalis</i> liar mutant conferring daptomycin resistance                                          | d      | 621  | 4   | 633  | 99.21  | 100.00 | 99.21  | 100.00 | 606.84  | 1.0e-26 |
| VFDB VFG002165                     | Endocarditis specific antigen                                                                            | d      | 921  | 5   | 927  | 99.68  | 100.00 | 99.68  | 100.00 | 904.26  | 1.0e-26 |
| VFDB VFG002166                     | Collagen adhesin protein                                                                                 | d      | 1644 | 11  | 2025 | 91.70  | 93.04  | 98.57  | 107.48 | 1608.56 | 1.0e-26 |
| VFDB VFG002189                     | Phosphatidate cytidyltransferase                                                                         | d      | 786  | 4   | 801  | 99.25  | 100.00 | 99.25  | 100.00 | 771.45  | 1.0e-26 |
| VFDB VFG002190                     | Undecaprenyl diphosphate synthase                                                                        | d      | 798  | 4   | 816  | 99.14  | 100.00 | 99.14  | 100.00 | 783.19  | 1.0e-26 |
| VFDB VFG002196                     | Polysaccharide lyase, family 8                                                                           | d      | 3597 | 22  | 4119 | 98.37  | 106.99 | 91.94  | 93.46  | 3530.76 | 1.0e-26 |
| VFDB VFG002197                     | Sugar-binding transcriptional regulator, lacI family                                                     | d      | 987  | 6   | 1011 | 99.11  | 100.00 | 99.11  | 100.00 | 968.79  | 1.0e-26 |
| VFDB VFG042976                     | Endocarditis and biofilm-associated pilus tip protein <i>ebpa</i>                                        | d      | 3261 | 18  | 3312 | 99.46  | 100.00 | 99.46  | 100.00 | 3206.87 | 1.0e-26 |
| VFDB VFG042977                     | Endocarditis and biofilm-associated pilus minor subunit <i>ebpb</i>                                      | d      | 1407 | 8   | 1431 | 99.37  | 100.00 | 99.37  | 100.00 | 1381.67 | 1.0e-26 |
| VFDB VFG042978                     | Endocarditis and biofilm-associated pilus major subunit <i>ebpc</i>                                      | d      | 1855 | 10  | 1878 | 99.68  | 100.32 | 99.36  | 99.68  | 1822.37 | 1.0e-26 |
| VFDB VFG042979                     | Sortase                                                                                                  | d      | 832  | 5   | 855  | 99.18  | 100.35 | 98.83  | 99.65  | 816.50  | 1.0e-26 |

|                |                                                                     |   |      |    |      |       |        |       |        |         |         |
|----------------|---------------------------------------------------------------------|---|------|----|------|-------|--------|-------|--------|---------|---------|
| VFDB VFG043508 | <i>E. faecalis</i> surface protein Fss1, fibrinogen binding protein | d | 5700 | 29 | 5964 | 98.51 | 100.00 | 98.51 | 100.00 | 5613.26 | 1.0e-26 |
|----------------|---------------------------------------------------------------------|---|------|----|------|-------|--------|-------|--------|---------|---------|

Template: Reference gene sequence; Genome: Genome that contains template gene; a: *Staphylococcus aureus*; b: *Streptococcus pneumoniae*; c: *E. faecium*; d: *E. faecalis* V583; e: *E. faecalis* OG1RF; f: *E. faecalis* EnGen0074; g: *Clostridium difficile* 630; h: *E. faecium* DO; i: *Geobacillus stearothermophilus*; j: *E. faecalis*; k: *Enterococcus*. GAS: Global alignment score of the template; EAS: Expected alignment score; TL: Template gene length in nucleotides; TI: Template Identity in percentage between the template and query, over the length of the matching query; TC: Template coverage in percentage of the template that is covered by the query; QI: Query identity in percentage between the query and template sequence, over the length of the matching query sequence; QC: Query coverage about the length of the matching query divided by the length of template; q value: Quantile from McNemars test, to test whether the current template is a significant hit.; p value: p-value corresponding to the obtained q-value.

**Table S3:** Antimicrobial resistant phenotype results observed in *Enterococcus faecalis* IRMC827A.

| # Antimicrobial             | Class          | WGS-predicted phenotype | Match | Genetic background                                      |
|-----------------------------|----------------|-------------------------|-------|---------------------------------------------------------|
| Tetracycline                | Tetracycline   | Resistant               | 3     | <i>tet(L) (tet(L)_M29725), tet(M) (tet(M) EU182585)</i> |
| Tigecycline                 | Tetracycline   | No resistance           | 0     |                                                         |
| Doxycycline                 | Tetracycline   | Resistant               | 3     | <i>tet(L) (tet(L)_M29725), tet(M) (tet(M) EU182585)</i> |
| Minocycline                 | Tetracycline   | Resistant               | 2     | <i>tet(M) (tet(M) EU182585)</i>                         |
| Metronidazole               | Nitroimidazole | No resistance           | 0     |                                                         |
| Rifampicin                  | Rifamycin      | No resistance           | 0     |                                                         |
| Hydrogen peroxide           | Peroxide       | No resistance           | 0     |                                                         |
| Cefoxitin                   | Beta-lactam    | No resistance           | 0     |                                                         |
| Ampicillin                  | Beta-lactam    | No resistance           | 0     |                                                         |
| Cefepime                    | Beta-lactam    | No resistance           | 0     |                                                         |
| Ticarcillin                 | Beta-lactam    | No resistance           | 0     |                                                         |
| Amoxicillin                 | Beta-lactam    | No resistance           | 0     |                                                         |
| Ceftazidime                 | Beta-lactam    | No resistance           | 0     |                                                         |
| Ticarcillin+clavulanic acid | Beta-lactam    | No resistance           | 0     |                                                         |
| Ceftriaxone                 | Beta-lactam    | No resistance           | 0     |                                                         |
| Meropenem                   | Beta-lactam    | No resistance           | 0     |                                                         |
| Cephalotin                  | Beta-lactam    | No resistance           | 0     |                                                         |
| Unknown beta-lactam         | Beta-lactam    | No resistance           | 0     |                                                         |
| Aztreonam                   | Beta-lactam    | No resistance           | 0     |                                                         |
| Piperacillin+tazobactam     | Beta-lactam    | No resistance           | 0     |                                                         |
| Cephalothin                 | Beta-lactam    | No resistance           | 0     |                                                         |
| Cefixime                    | Beta-lactam    | No resistance           | 0     |                                                         |

|                              |                       |               |   |                                 |
|------------------------------|-----------------------|---------------|---|---------------------------------|
| Cefotaxime+clavulanic acid   | Beta-lactam           | No resistance | 0 |                                 |
| Penicillin                   | Beta-lactam           | No resistance | 0 |                                 |
| Imipenem                     | Beta-lactam           | No resistance | 0 |                                 |
| Ampicillin+clavulanic acid   | Beta-lactam           | No resistance | 0 |                                 |
| Ceftazidime+avibactam        | Beta-lactam           | No resistance | 0 |                                 |
| Ertapenem                    | Beta-lactam           | No resistance | 0 |                                 |
| Piperacillin                 | Beta-lactam           | No resistance | 0 |                                 |
| Amoxicillin+clavulanic acid  | Beta-lactam           | No resistance | 0 |                                 |
| Temocillin                   | Beta-lactam           | No resistance | 0 |                                 |
| Piperacillin+clavulanic acid | Beta-lactam           | No resistance | 0 |                                 |
| Cefotaxime                   | Beta-lactam           | No resistance | 0 |                                 |
| Quinupristin+dalfopristin    | Streptogramin a       | No resistance | 0 |                                 |
| Dalfopristin                 | Streptogramin a       | Resistant     | 2 | <i>lsa(A) (lsa(A)_AY737526)</i> |
| Virginiamycin m              | Streptogramin a       | Resistant     | 2 | <i>lsa(A) (lsa(A)_AY737526)</i> |
| Pristinamycin iia            | Streptogramin a       | Resistant     | 2 | <i>lsa(A) (lsa(A)_AY737526)</i> |
| Temperature                  | Heat                  | No resistance | 0 |                                 |
| Fosfomycin                   | Fosfomycin            | No resistance | 0 |                                 |
| Fusidic acid                 | Steroid antibacterial | No resistance | 0 |                                 |
| Chloramphenicol              | Amphenicol            | Resistant     | 2 | <i>cat (cat_U35036)</i>         |
| Florfenicol                  | Amphenicol            | No resistance | 0 |                                 |
| Mupirocin                    | Pseudomonic acid      | No resistance | 0 |                                 |
| Linezolid                    | Oxazolidinone         | No resistance | 0 |                                 |
| Tiamulin                     | Pleuromutilin         | No resistance | 0 |                                 |
| Formaldehyde                 | Aldehyde              | No resistance | 0 |                                 |
| Ceftiofur                    | Under_development     | No resistance | 0 |                                 |
| Spectinomycin                | Aminocyclitol         | No resistance | 0 |                                 |
| Butirosin                    | Aminoglycoside        | No resistance | 0 |                                 |
| Isepamicin                   | Aminoglycoside        | No resistance | 0 |                                 |
| Arbekacin                    | Aminoglycoside        | No resistance | 0 |                                 |
| Kasugamycin                  | Aminoglycoside        | No resistance | 0 |                                 |

|                          |                              |               |   |                                 |
|--------------------------|------------------------------|---------------|---|---------------------------------|
| Kanamycin                | Aminoglycoside               | No resistance | 0 |                                 |
| Netilmicin               | Aminoglycoside               | No resistance | 0 |                                 |
| Paromomycin              | Aminoglycoside               | No resistance | 0 |                                 |
| Apramycin                | Aminoglycoside               | No resistance | 0 |                                 |
| Unknown aminoglycoside   | Aminoglycoside               | No resistance | 0 |                                 |
| Butiromycin              | Aminoglycoside               | No resistance | 0 |                                 |
| Amikacin                 | Aminoglycoside               | No resistance | 0 |                                 |
| Astromicin               | Aminoglycoside               | No resistance | 0 |                                 |
| Tobramycin               | Aminoglycoside               | No resistance | 0 |                                 |
| Ribostamycin             | Aminoglycoside               | No resistance | 0 |                                 |
| Neomycin                 | Aminoglycoside               | No resistance | 0 |                                 |
| Hygromycin               | Aminoglycoside               | No resistance | 0 |                                 |
| Fortimicin               | Aminoglycoside               | No resistance | 0 |                                 |
| Dibekacin                | Aminoglycoside               | No resistance | 0 |                                 |
| Sisomicin                | Aminoglycoside               | No resistance | 0 |                                 |
| Gentamicin               | Aminoglycoside               | No resistance | 0 |                                 |
| Streptomycin             | Aminoglycoside               | Resistant     | 3 | <i>str (str_X92946)</i>         |
| Bleomycin                | Aminoglycoside               | No resistance | 0 |                                 |
| Lividomycin              | Aminoglycoside               | No resistance | 0 |                                 |
| Clindamycin              | Lincosamide                  | Resistant     | 2 | <i>lsa(A) (lsa(A)_AY737526)</i> |
| Lincomycin               | Lincosamide                  | Resistant     | 2 | <i>lsa(A) (lsa(A)_AY737526)</i> |
| Colistin                 | Polymyxin                    | No resistance | 0 |                                 |
| Trimethoprim             | Folate pathway antagonist    | Resistant     | 3 | <i>dfrG (dfrG_AB205645)</i>     |
| Sulfamethoxazole         | Folate pathway antagonist    | No resistance | 0 |                                 |
| Chlorhexidine            | Quaternary ammonium compound | No resistance | 0 |                                 |
| Benzylkonium chloride    | Quaternary ammonium compound | No resistance | 0 |                                 |
| Cetylpyridinium chloride | Quaternary ammonium compound | No resistance | 0 |                                 |

|                   |                              |               |   |                                     |
|-------------------|------------------------------|---------------|---|-------------------------------------|
| Ethidium bromide  | Quaternary ammonium compound | No resistance | 0 |                                     |
| Carbomycin        | Macrolide                    | No resistance | 0 |                                     |
| Azithromycin      | Macrolide                    | No resistance | 0 |                                     |
| Telithromycin     | Macrolide                    | No resistance | 0 |                                     |
| Erythromycin      | Macrolide                    | No resistance | 0 |                                     |
| Oleandomycin      | Macrolide                    | No resistance | 0 |                                     |
| Spiramycin        | Macrolide                    | No resistance | 0 |                                     |
| Tylosin           | Macrolide                    | No resistance | 0 |                                     |
| Virginiamycin s   | Streptogramin b              | No resistance | 0 |                                     |
| Pristinamycin ia  | Streptogramin b              | No resistance | 0 |                                     |
| Quinupristin      | Streptogramin b              | No resistance | 0 |                                     |
| Vancomycin        | Glycopeptide                 | No resistance | 0 |                                     |
| Teicoplanin       | Glycopeptide                 | No resistance | 0 |                                     |
| Fluoroquinolone   | Quinolone                    | No resistance | 0 |                                     |
| Unknown quinolone | Quinolone                    | No resistance | 0 |                                     |
| Nalidixic acid    | Quinolone                    | Resistant     | 3 | <i>gyrA (p.S83Y), parC (p.S80I)</i> |
| Ciprofloxacin     | Quinolone                    | Resistant     | 3 | <i>gyrA (p.S83Y), parC (p.S80I)</i> |

Match: 0: No match found; 1: Match < 100% ID AND match length < ref length; 2: Match = 100% ID AND match length < ref length; 3: Match = 100% ID AND match length = ref length.

**Table S4:** Antimicrobial resistant phenotype specific for *Enterococcus faecalis* results observed in *E. faecalis* IRMC827A.

| # Antimicrobial | Class          | WGS-predicted phenotype | Match | Genetic background                                      |
|-----------------|----------------|-------------------------|-------|---------------------------------------------------------|
| Tetracycline    | Tetracycline   | Resistant               | 3     | <i>tet(L) (tet(L)_M29725), tet(M) (tet(M)_EU182585)</i> |
| Tigecycline     | Tetracycline   | No resistance           | 0     |                                                         |
| Teicoplanin     | Glycopeptide   | No resistance           | 0     |                                                         |
| Ciprofloxacin   | Quinolone      | Resistant               | 3     | <i>gyrA (p.S83Y), parC (p.S80I)</i>                     |
| Erythromycin    | Macrolide      | No resistance           | 0     |                                                         |
| Vancomycin      | Glycopeptide   | No resistance           | 0     |                                                         |
| Linezolid       | Oxazolidinone  | No resistance           | 0     |                                                         |
| Fosfomycin      | Fosfomycin     | No resistance           | 0     |                                                         |
| Chloramphenicol | Amphenicol     | Resistant               | 2     | <i>cat (cat_U35036)</i>                                 |
| Gentamicin      | Aminoglycoside | No resistance           | 0     |                                                         |

Match: 0: No match found; 1: Match < 100% ID AND match length < ref length; 2: Match = 100% ID AND match length < ref length; 3: Match = 100% ID AND match length = ref length.

**Table S5: List of pathogenic protein families of the IRMC827A.**

|    | Organism                          | Class           | Protein function                                             | Protein ID | Identity |
|----|-----------------------------------|-----------------|--------------------------------------------------------------|------------|----------|
| 1  | <i>Enterococcus faecalis</i> V583 | Lactobacillales | sigma-54 interaction domain protein                          | AAO80815   | 100%     |
| 2  | <i>Enterococcus faecalis</i> V583 | Lactobacillales | lipoprotein, putative                                        | AAO79950   | 99.61%   |
| 3  | <i>Enterococcus faecalis</i> V583 | Lactobacillales | pheromone binding protein, putative                          | AAO79943   | 100%     |
| 4  | <i>Enterococcus faecalis</i> V583 | Lactobacillales | peptide ABC transporter, peptide-binding protein             | AAO80715   | 99.82%   |
| 5  | <i>Enterococcus faecalis</i> V583 | Lactobacillales | pheromone binding protein                                    | AAO82723   | 100%     |
| 6  | <i>Enterococcus faecalis</i> V583 | Lactobacillales | membrane protein, putative                                   | AAO81879   | 99.6%    |
| 7  | <i>Enterococcus faecalis</i> V583 | Lactobacillales | DNA-binding response regulator, AraC family                  | AAO81949   | 99.59%   |
| 8  | <i>Enterococcus faecalis</i> V583 | Lactobacillales | C4-dicarboxylate transporter, putative                       | AAO79983   | 100%     |
| 9  | <i>Enterococcus faecalis</i> V583 | Lactobacillales | D-alanyl-D-alanine carboxypeptidase                          | AAO82807   | 99.59%   |
| 10 | <i>Enterococcus faecalis</i> V583 | Lactobacillales | ribonuclease PH/Ham1 protein                                 | AAO80922   | 99.75%   |
| 11 | <i>Enterococcus faecalis</i> V583 | Lactobacillales | FolC family protein                                          | AAO82616   | 100%     |
| 12 | <i>Enterococcus faecalis</i> V583 | Lactobacillales | regulatory protein pfoR, putative                            | AAO79972   | 99.73%   |
| 13 | <i>Enterococcus faecalis</i> V583 | Lactobacillales | transposase, putative                                        | AAO80721   | 99.72%   |
| 14 | <i>Enterococcus faecalis</i> V583 | Lactobacillales | carbohydrate kinase, pfkB family                             | AAO80652   | 99.70%   |
| 15 | <i>Enterococcus faecalis</i> V583 | Lactobacillales | sugar-binding transcriptional regulator,                     | AAO80046   | 100%     |
| 16 | <i>Enterococcus faecalis</i> V583 | Lactobacillales | iron compound ABC transporter, iron compound-binding protein | AAO81420   | 100%     |
| 17 | <i>Enterococcus faecalis</i> V583 | Lactobacillales | aminoglycoside 6-adenylyltransferase                         | AAO82553   | 99.65%   |
| 18 | <i>Enterococcus faecalis</i> V583 | Lactobacillales | MutT/nudix family protein                                    | AAO82404   | 100%     |
| 19 | <i>Enterococcus faecalis</i> V583 | Lactobacillales | PTS system, IIC component                                    | AAO82884   | 100%     |
| 20 | <i>Enterococcus faecalis</i> V583 | Lactobacillales | conserved hypothetical protein                               | AAO80309   | 99.61%   |

|           |                                   |                 |                                                                       |          |        |
|-----------|-----------------------------------|-----------------|-----------------------------------------------------------------------|----------|--------|
| <b>21</b> | <i>Enterococcus faecalis</i> V583 | Lactobacillales | phosphosugar-binding transcriptional regulator, RpiR family, putative | AAO82731 | 100%   |
| <b>22</b> | <i>Enterococcus faecalis</i> V583 | Lactobacillales | hydrolase, haloacid dehalogenase-like family                          | AAO82386 | 99.58% |
| <b>23</b> | <i>Enterococcus faecalis</i> V583 | Lactobacillales | cell division protein DivIVA                                          | AAO80808 | 100%   |
| <b>24</b> | <i>Enterococcus faecalis</i> V583 | Lactobacillales | MgtC family protein                                                   | AAO80322 | 100%   |
| <b>25</b> | <i>Enterococcus faecalis</i> V583 | Lactobacillales | transcriptional regulator, Crp/Fnr family                             | AAO79952 | 100%   |
| <b>26</b> | <i>Enterococcus faecalis</i> V583 | Lactobacillales | nitroreductase family protein, putative                               | AAO80478 | 100%   |
| <b>27</b> | <i>Enterococcus faecalis</i> V583 | Lactobacillales | conserved hypothetical protein                                        | AAO82554 | 100%   |
| <b>28</b> | <i>Enterococcus faecalis</i> V583 | Lactobacillales | conserved hypothetical protein                                        | AAO82735 | 100%   |
| <b>29</b> | <i>Enterococcus faecalis</i> V583 | Lactobacillales | transcriptional regulator, TetR family                                | AAO82741 | 100%   |
| <b>30</b> | <i>Enterococcus faecalis</i> V583 | Lactobacillales | conserved hypothetical protein                                        | AAO81470 | 100%   |
| <b>31</b> | <i>Enterococcus faecalis</i> V583 | Lactobacillales | signal peptidase I                                                    | AAO81456 | 100%   |
| <b>32</b> | <i>Enterococcus faecalis</i> V583 | Lactobacillales | conserved hypothetical protein                                        | AAO80229 | 100%   |
| <b>33</b> | <i>Enterococcus faecalis</i> V583 | Lactobacillales | PTS system, IIB component                                             | AAO82883 | 100%   |
| <b>34</b> | <i>Enterococcus faecalis</i> V583 | Lactobacillales | conserved hypothetical protein                                        | AAO82774 | 100%   |
| <b>35</b> | <i>Enterococcus faecalis</i> V583 | Lactobacillales | transcriptional regulator SrlR                                        | AAO82973 | 100%   |
| <b>36</b> | <i>Enterococcus faecalis</i> V583 | Lactobacillales | PTS system, IIA component                                             | AAO80516 | 100%   |
| <b>37</b> | <i>Enterococcus faecalis</i> V583 | Lactobacillales | transcriptional regulator, MarR family                                | AAO81446 | 100%   |
| <b>38</b> | <i>Enterococcus faecalis</i> V583 | Lactobacillales | PTS system, IIA component, putative                                   | AAO82882 | 100%   |
| <b>39</b> | <i>Enterococcus faecalis</i> V583 | Lactobacillales | PTS system, IIA component                                             | AAO80316 | 100%   |
| <b>40</b> | <i>Enterococcus faecalis</i> V583 | Lactobacillales | nrdI protein                                                          | AAO80327 | 100%   |
| <b>41</b> | <i>Enterococcus faecalis</i> V583 | Lactobacillales | Conserved hypothetical protein                                        | AAO81798 | 100%   |
| <b>42</b> | <i>Enterococcus faecalis</i> V583 | Lactobacillales | Conserved hypothetical protein                                        | AAO82991 | 100%   |

|    |                                                              |                 |                                                |          |        |
|----|--------------------------------------------------------------|-----------------|------------------------------------------------|----------|--------|
| 43 | <i>Enterococcus faecalis</i> V583                            | Lactobacillales | competence protein                             | AAO81779 | 100%   |
| 44 | <i>Enterococcus faecalis</i> V583                            | Lactobacillales | ferredoxin                                     | AAO81330 | 100%   |
| 45 | <i>Enterococcus faecalis</i> V583                            | Lactobacillales | conserved hypothetical protein                 | AAO80806 | 100%   |
| 46 | <i>Enterococcus faecalis</i> V583                            | Lactobacillales | ribosomal protein L29                          | AAO80083 | 100%   |
| 47 | <i>Enterococcus faecalis</i> V583                            | Lactobacillales | hypothetical protein                           | AAO81074 | 100%   |
| 48 | <i>Enterococcus faecalis</i> V583<br>plasmid pTEF1           | Lactobacillales | conserved domain protein                       | AAO83066 | 100%   |
| 49 | <i>Enterococcus faecalis</i> V583<br>plasmid pTEF1           | Lactobacillales | site-specific recombinase, resolvase family    | AAO83065 | 100%   |
| 50 | <i>Enterococcus faecalis</i> V583<br>plasmid pTEF1           | Lactobacillales | mpB/MucB/SamB family protein                   | AAO83069 | 99.77% |
| 51 | <i>Streptococcus pneumoniae</i> G54                          | Lactobacillales | Tn5251 transcriptional regulator Cro/CI family | ACF55955 | 100%   |
| 52 | <i>Staphylococcus aureus</i> subsp.<br><i>aureus</i> Mu3 DNA | Bacillales      | plasmid recombination enzyme                   | BAF76914 | 100%   |
| 53 | <i>Streptococcus suis</i> 05ZYH33                            | Lactobacillales | Tn916, transposase                             | ABP89883 | 100%   |
| 54 | <i>Streptococcus agalactiae</i><br>2603V/R                   | Lactobacillales | Tn916, hypothetical protein                    | AAM99805 | 100%   |
| 55 | <i>Streptococcus pneumoniae</i><br>Hungary19A-6              | Lactobacillales | conserved hypothetical protein                 | ACA36408 | 100%   |

**Table S6: List of mobile genetic elements associated with antibiotic resistance of the IRMC827A.**

| <b>MGE no</b> | <b>name</b> | <b>prediction method</b> | <b>type</b>                     | <b>allele_len</b> | <b>e_value</b> | <b>identity</b> | <b>coverage</b> | <b>gaps</b> | <b>substitution</b> | <b>contig</b> | <b>start</b> | <b>stop</b> | <b>cigar</b> |
|---------------|-------------|--------------------------|---------------------------------|-------------------|----------------|-----------------|-----------------|-------------|---------------------|---------------|--------------|-------------|--------------|
| 1             | Tn6009      | alignment to reference   | Integrative Conjugative Element | 1889              | 0              | 0.999471        | 1               | 0           | 1                   | Scaffold2     | 31342        | 33230       | M1889        |
| 6             | ISS1N       | alignment to reference   | Insertion sequence              | 808               | 0              | 0.985149        | 1               | 0           | 12                  | Scaffold22    | 16162        | 16969       | M808         |



## dfrG gene

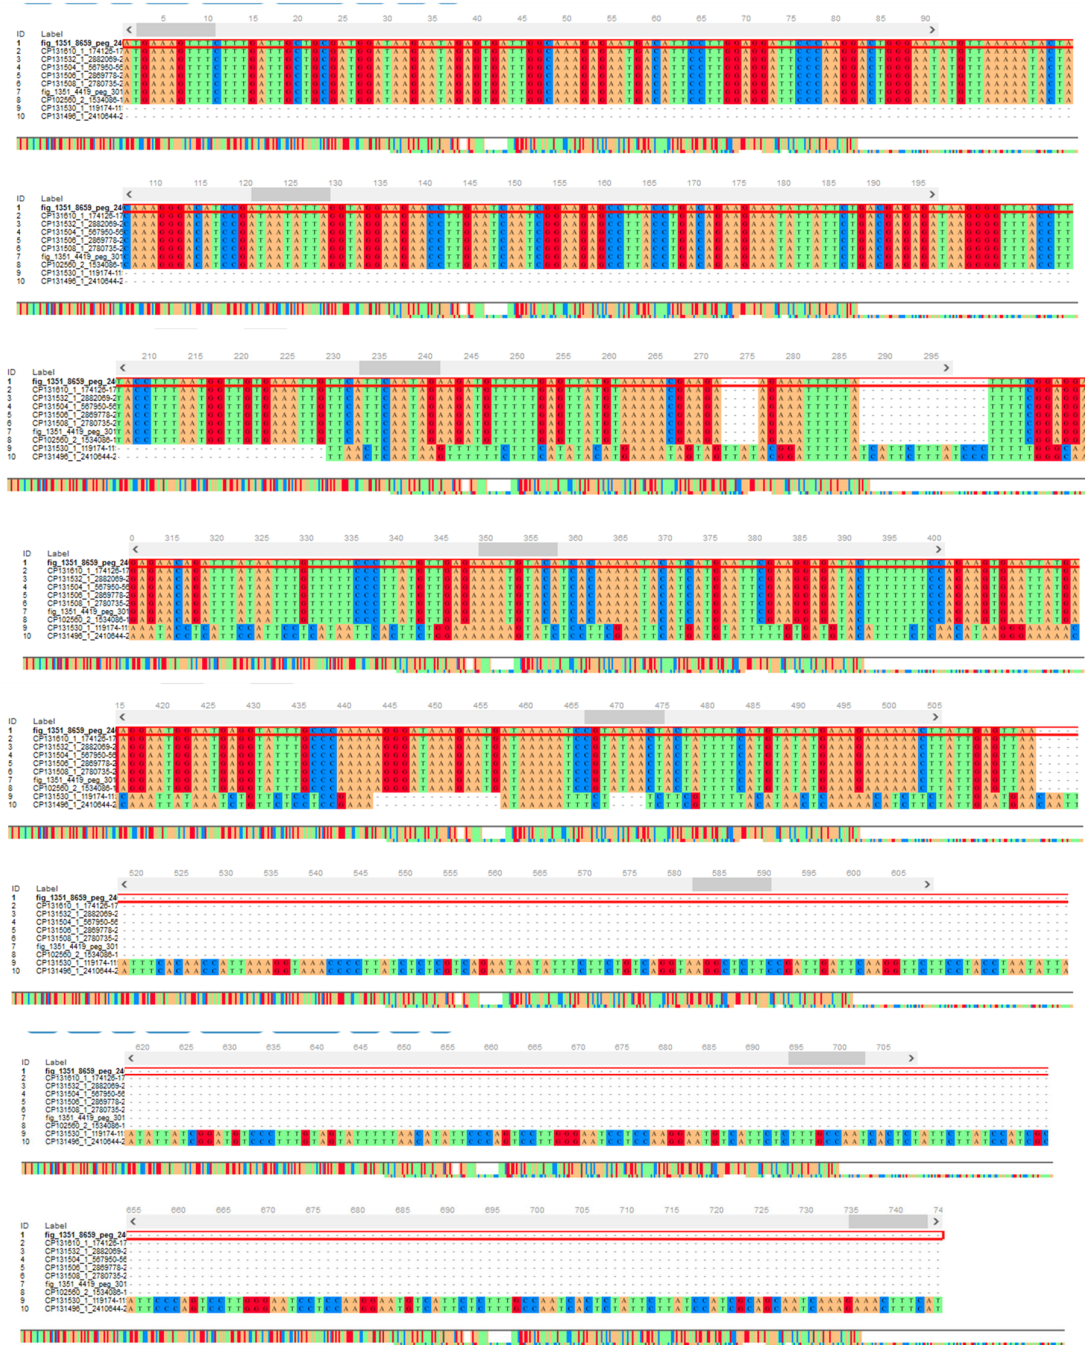

**Figure S1:** Multiple sequence alignment of *dfrG* gene from *Enterococcus faecalis* IRMC827A.
